# Supplementary material for: Hypoxia and loss of GCM1 expression prevents differentiation and contact inhibition in human trophoblast stem cells
Source: PubMed Central journal article supplement (PMC11419009; doi:10.1101/2024.09.10.612343), 2024-09-10
Supplement: NIHPP2024.09.10.612343v1-supplement-6.pdf [file NIHPP2024.09.10.612343v1-supplement-6.pdf]

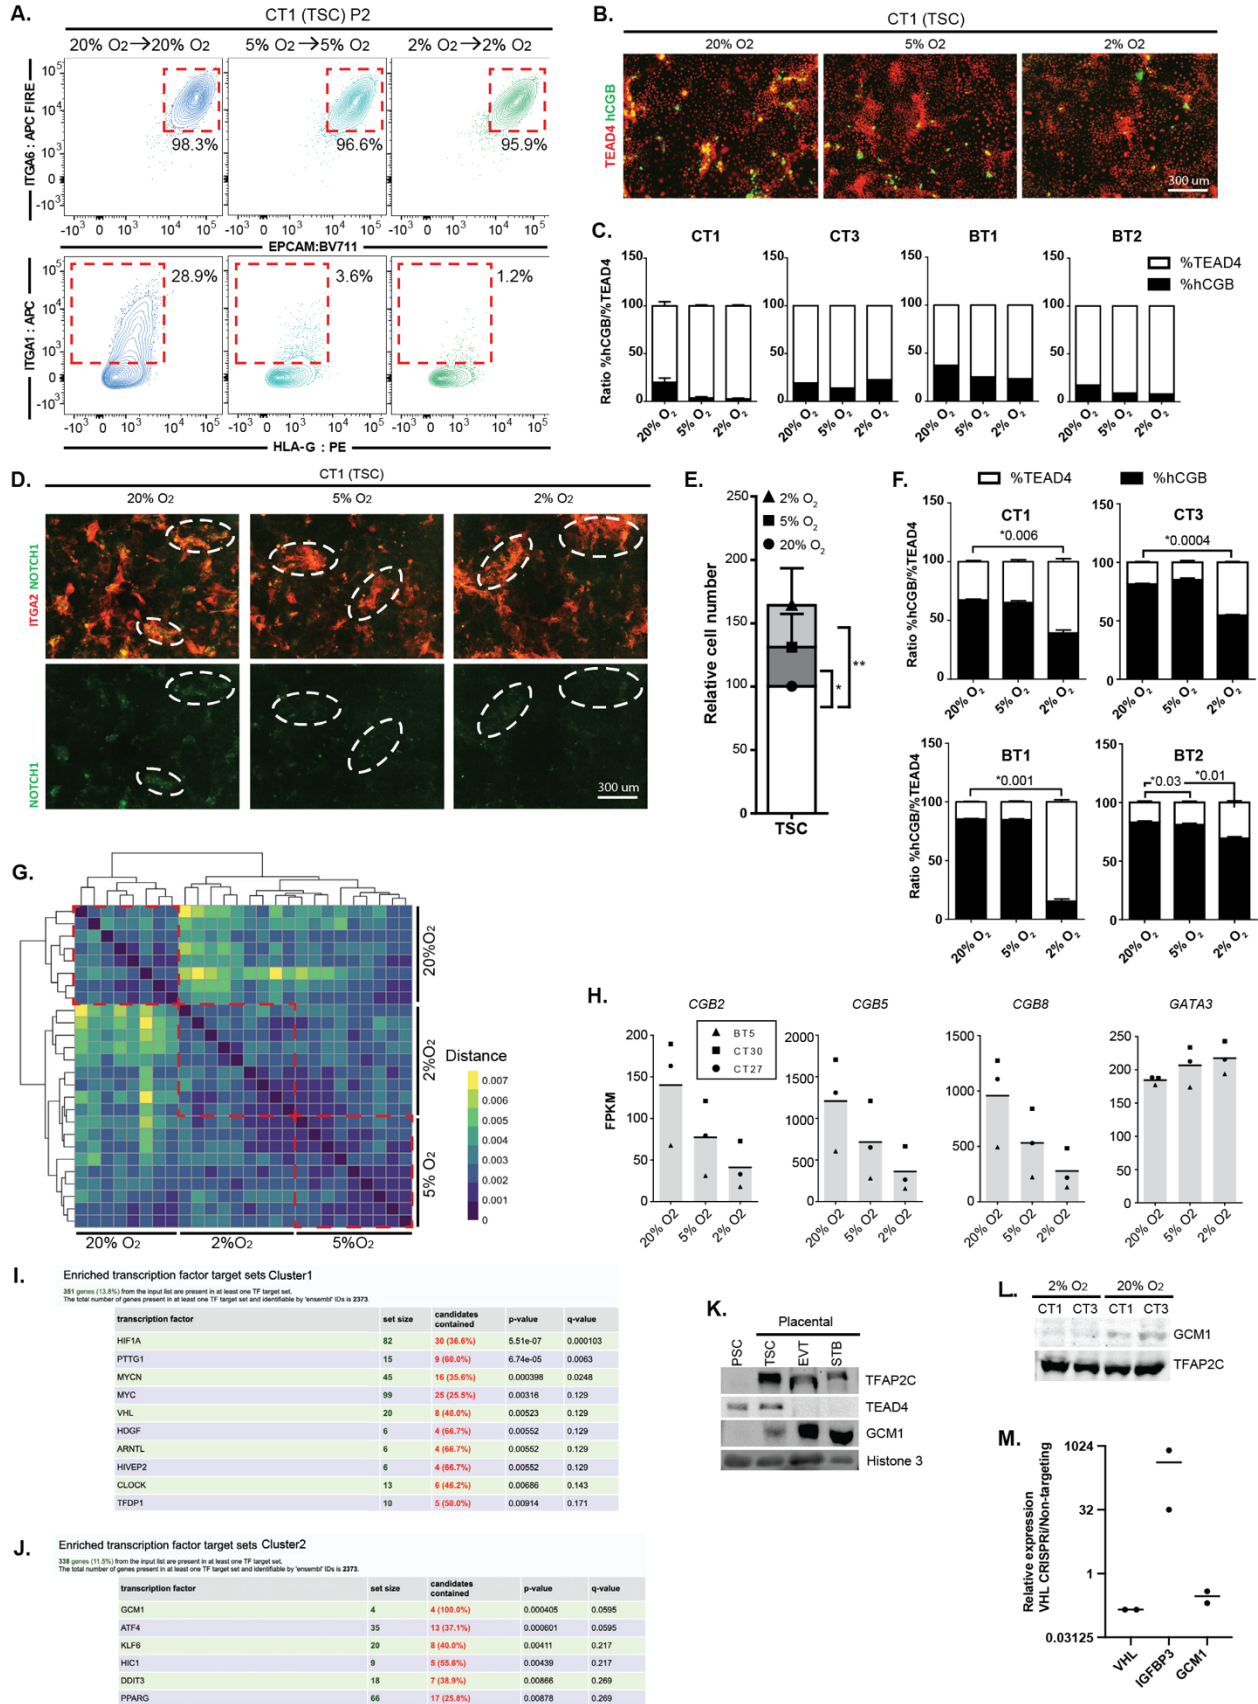

**Figure S1. Reduced and impaired hTSC differentiation in hypoxic conditions.** **A.** Trophoblast stem cells shown in Figure 1A were passaged and cultured for additional 72hrs in varying levels of oxygen (20%, 5%, 2% O<sub>2</sub>). Continued low oxygen tension causes further reduction of ITGA1<sup>+</sup> cell population. **B.** Spontaneous differentiation of hTSC to STB in as indicated by loss of TEAD4 and gain of hCGB. Note trend toward higher hCGB staining at 20% O<sub>2</sub>. **C.** Quantification of spontaneous hCGB expression across multiple cell lines at oxygen concentration indicated (4 cell lines, n=4 for each cell line). **D.** hTSC in the varying oxygen conditions were grown to over maximum confluency. At regions where overgrowth causes increase cell-to-cell contact and cell pile-up, spontaneous nuclear NOTCH1 signal is observed. In the low oxygen cultures, NOTCH1 expression is not detected. **E.** Relative numbers of TEAD4<sup>+</sup> cells per unit area (4 cell lines, n=4 for each cell line). **F.** Quantification of spontaneous hCGB expression across multiple cell lines at oxygen concentration indicated (4 cell lines, n=4 for each cell line). **G.** Correlation matrix showing sample clustering of RNA-seq data from hTSCs in culture conditions indicated (3 cell lines, n=3 for each line in each condition). **H.** Bar graphs showing FPKM of specific genes of interest (n=3 replicates, except BT2 at 20% O<sub>2</sub> n=2). **I., J.** ConsensusPathwayDB analysis of Cluster 1 and Cluster 2 from Figure 1H, identifying TF targets with significance from each cluster. **K.** Western blot comparing pluripotent stem cell (PSC) that don't express placental markers, with hTSC and differentiated EVT and STB to highlight specific expression patterns. **L.** Western blot for GCM1 in 2 cell lines grown in 2% and 20% O<sub>2</sub>. TFAP2C is the loading control. **M.** Ratio of expression for genes indicated in hTSCs subjected to CRISPRi-targeted degradation of VHL relative to control hTSC. Note reduced expression of GCM1, while known hypoxia target IGFBP3 is dramatically upregulated.

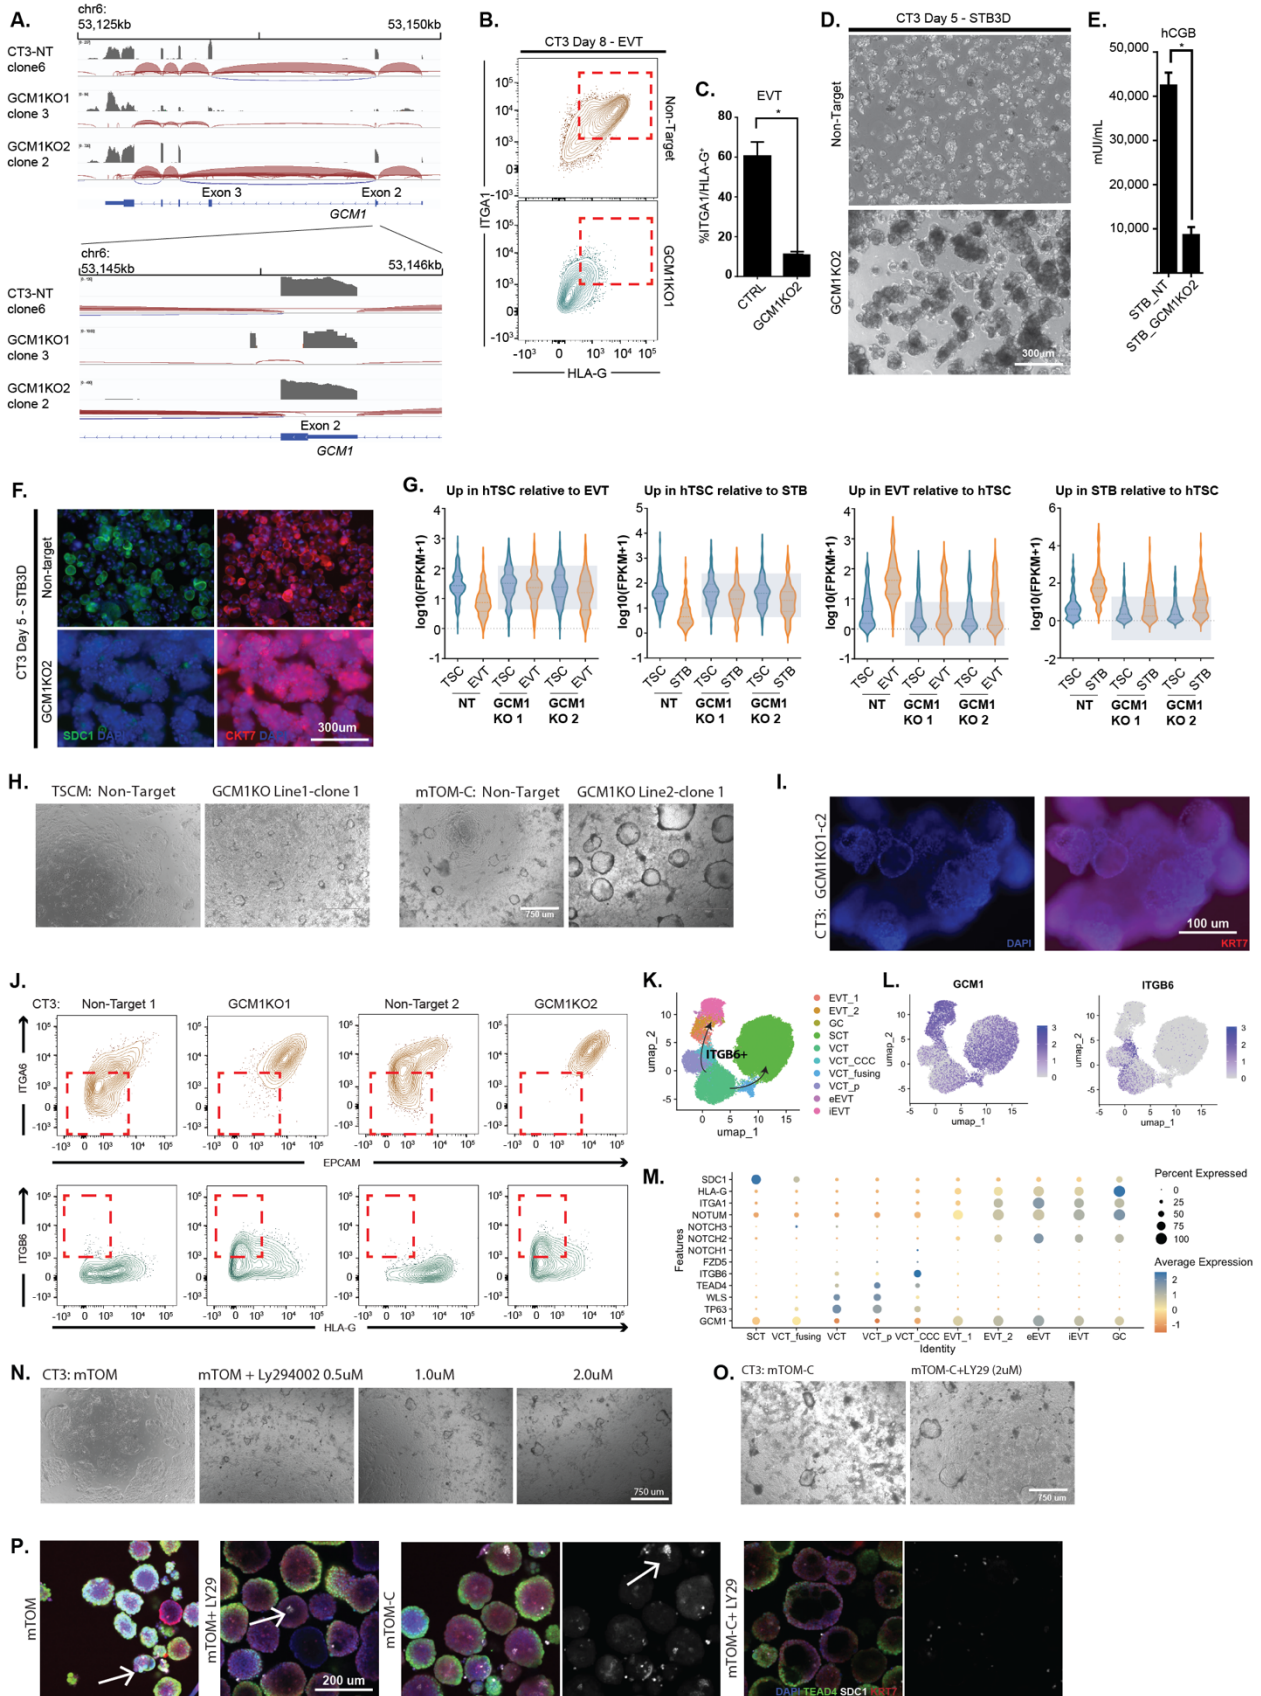

**Figure S2. Impaired differentiation upon genetic or chemical reduction in GCM1 level. A.** Sashimi plot across the genomic region of *GCM1*. Representative clones were chosen. Normal splicing is observed from non-target line. *GCM1*<sup>-/-</sup> Line1 (from right to left) show a deletion at the distal tip of exon 2 but an alternative splice site forming just after. *GCM1*<sup>-/-</sup> Line 2 shows the complete skipping of exon 3. **B.** Flow cytometric analysis from EVT differentiation of *GCM1*<sup>-/-</sup> Line 2 and NT hTSC. NT cells differentiation produce ITGA1<sup>hi</sup>/HLA-G<sup>hi</sup> cells whereas *GCM1*<sup>-/-</sup> TSC do not. **C.** Bar graph showing formation of ITGA1<sup>hi</sup>/HLA-G<sup>hi</sup> population from control and *GCM1*<sup>-/-</sup> Line 2 hTSC (n=3 replicates). **D.** STB3D formation of NT and *GCM1*<sup>-/-</sup> Line 2 hTSC. Control hTSCs form a fluid-filled syncytium while *GCM1*<sup>-/-</sup> form a cluster of cells. **E.** hCGB ELISA was performed using supernatant from *GCM1*<sup>-/-</sup> and control hTSC (n=3 replicates). **F.** Control and *GCM1*<sup>-/-</sup> Line 2 STB3D stained for the STB-marker SDC1 and the pan-placental marker CKT7. Note absence of SDC1 in *GCM1*<sup>-/-</sup>. **G.** Violin plot showing expression of genes specific to hTSC, EVT or STB in cell types indicated. Differentiated *GCM1*<sup>-/-</sup> cells fail to express differentiation markers and retain expression of TSC markers instead. **H.** *GCM1*<sup>-/-</sup>-hTSC were grown in mTOM with and without CHIR99021. Dome-like projections appeared in regions of high cell density. **I.** Immunofluorescent staining of *GCM1*<sup>-/-</sup> trophoblast organoids. **J.** Flow cytometry of NT and *GCM1*<sup>-/-</sup> -3D-TSC differentiated to EVT. *GCM1*<sup>-/-</sup> hTSCs fail to upregulate the EVT marker HLA-G but do upregulate the cell-column marker, ITGB6. **K.-M** Reanalysis of Arut. *et al.* 2022 single RNA-seq profiling the several subtypes found in early villus of the placenta. **K.** Cell types in placenta, with path of differentiation indicated. (GC=Giant Cell, VCT = villous CTB, VCT\_p=proliferating CTB, VCT\_CCC = cell column cytotrophoblast eEVT=endovascular EVT, iEVT= interstitial EVT). **L.** Expression of GCM1 and ITGB6 in cells shown in (K). **M.** Expression of genes indicated in cell types indicated. Note that ITGB6 is associated with cell column cytotrophoblast. **N.** hTSC cultured in mTOM media with varying quantities of LY294002. **O.** hTSC cultured in mTOM-C with or without LY294002 2μM. **P.** day14 TB-ORG grown in mTOM or mTOM-C with or without LY294002 2μM treatment and IF stained for DAPI, TEAD4, SDC1, and KRT7. Arrows mark areas of SDC1 expression.



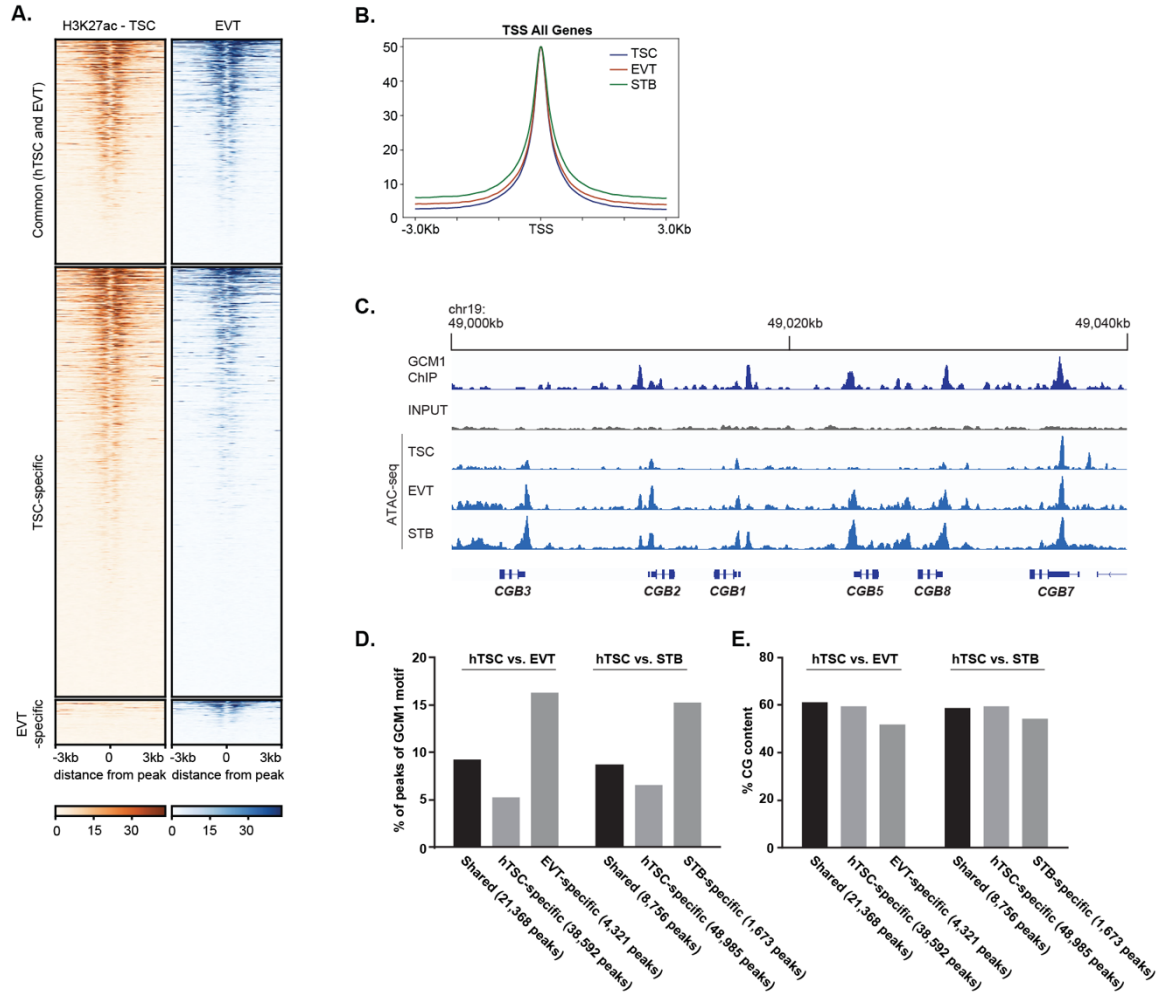

**Figure S3. GCM1 positively regulates differentiation-associated genes.** **A.** Heatmap of H3K27Ac enrichment over common, hTSC-specific, and EVT-specific ATAC-seq peaks in hTSC and EVT. Note correspondence of H3K27Ac enrichment with ATAC enrichment in each set. **B.** Metaplot of ATAC-seq data from TSC, EVT and STB over all gene TSS after normalization. **C.** GCM1 ChIP-seq and ATAC-seq data plotted over the *CGB* locus. **D.** Percentage of peaks in each category containing GCM motifs. **E.** GC content of ATAC-seq peaks in each category. GCM1 has a GC-rich motif, but the higher frequency of GCM1 sites observed in **(D)** cannot be explained by difference in underlying GC richness.
